# Supplementary material
Source: publisher site journal article supplement (https://www.dovepress.com/article/408307)
Supplement: Supplementary file 1 [file get_supplementary_file.php]

**Supplementary Table 1**

**PATIENT WITH COPD EXAMINED IN ER AND HOSPITALIZED (HDL)**

| **Variable** | **Type** | **Responses** |
| --- | --- | --- |
|  |  |  |
| **Identifiers** | Numerical |  |
| **Patient Demographics** |  |  |
| Sex | Categorical | Female; Male |
| Age (Years) | Numerical |  |
| **ED admission** |  |  |
| Referral pathway | Categorical | GP referral; Ambulance service; On own initiative; Not specified |
| Initial examination in ER | Categorical | Pulmonologist; Specialist of other specialties; Resident |
| Referral diagnosis | Categorical | Acute exacerbation of COPD; Pneumonia; Cardiac decompensation; Asthma; Respiratory failure; Dyspnea; else; Not specified |
| **Smoking** |  |  |
| Smoking status | Categorical | Current smoker; Ex-smoker; Never smoked; Not specified |
| Years of smoking | Numerical |  |
| Daily smoked cigarettes | Numerical |  |
| **COPD severity** |  |  |
| Earlier COPD treatment (years) | Numerical |  |
| Stage of COPD (GOLD I-IV) | Categorical | GOLD I; GOLD II; GOLD III; GOLD IV; Not specified |
| Stage of COPD (GOLD A-D) | Categorical | GOLD A; GOLD B; GOLD C; GOLD D; Not specified |
| **Comorbidities** |  |  |
| Comorbidities | Categorical | Cardiovascular diseases; Arterial hypertension; Diabetes; Obesity; Cachexia; Osteoporosis; Else; Not specified |
| **Previous treatment of COPD** |  |  |
| Previous medication | Categorical | SABA; SAMA; nebulized SABA/SAMA; LABA; LAMA; LABA/LAMA; ICS/LABA; ICS/LABA/LAMA; ICS, Theophylline; Roflumilast; Azithromycin as an immunomodulator; Not specified |
| Inhaler use | Categorical | Yes; No, Not specified |
| Inhaler type | Categorical | pMDI; DPI; Soft mist inhaler; pMDI with spacer |
| COPD therapy adherence | Categorical | Yes; No; Not specified |
| Long term oxygen therapy | Categorical | Yes; No; Not specified |
| **Spirometry** |  |  |
| Earlier spirometry | Categorical | Yes; No; Not specified |
| FEV1 % | Categorical | >=80%; 50-79%; 30-49%; <30% |
| **Previous exacerbations** |  |  |
| AE COPD in previous 12 months | Categorical | Yes; No, Not specified |
| Previous hospitalization for AECOPD | Categorical | Yes, Department; Yes , ICU; No; Not specified |
| Frequent exacerbator | Categorical | Yes; No; Not specified |
| **Current exacerbation** |  |  |
| Symptoms | Categorical | Dyspnea; fever; cough; increased expectoration; purulent cough, Not specified |
| Investigations | Categorical | Complete blood count; Basic biochemistry; troponin; D-dimers; NT pro-BNP; ECG; Chest X-ray; Chest HRCT; MSCT lung angiography; Oxygen hemoglobin saturation; Arterial blood gas analysis; Not specified |
| Blood eosinophil count specified | Categorical | Yes, No |
| Blood eosinophil count (%) | Numerical |  |
| Blood eosinophil count (Eos/mm3) | Numerical |  |
| Therapy of AE in ER | Categorical | Oxygen; SABA; SAMA; systemic corticosteroid; aminophylline; antibiotic; diuretic, Not specified |
| **Current hospitalization for AE** |  |  |
| Reason for hospitalization | Categorical | Severe AE; Respiratory failure; Cardiac decompensation; Pneumonia; Acute pulmonary embolism; Not specified |
| Hospitalization place | Categorical | ICU; Hospital unit; ICU and hospital unit |
| Days of hospitalization | Numerical |  |
| Medication | Categorical | Oxygen; SABA; SAMA; Systemic corticosteroid; Aminophylline; Antibiotic; Diuretic; Low molecular weight heparin, Proton pump inhibitor; Else, Not specified |
| Non-invasive ventilation | Categorical | Yes; No |
| Mechanical ventilation | Categorical | Yes; No |
| Pulmonary rehabilitation | Categorical | Yes; No |
| Education on the proper use of inhalers | Categorical | Yes; No |
| Blood eosinophil count (%) | Numerical |  |
| Blood eosinophil count (Eos/mm3) | Numerical |  |
| Echocardiography | Categorical | Yes; No |
| Chest high-resolution computed tomography (HRCT) | Categorical | Yes; No |
| Lung angiography by multi-slice CT (MSCT) | Categorical | Yes; No |
| Spirometry | Categorical | Yes; No |
| **Data from Discharge Letter** |  |  |
| Hospitalization outcome | Categorical | Discharge home; Transfer to a chronic-type institution, Death |
| Stage of COPD estimation | Categorical | Yes; No |
| AE severity estimation | Categorical | Yes; No |
| Blood eosinophil count finding analysis | Categorical | Yes; No |
| AE etiology (phenotype) | Categorical | Infective; Eosinophilic; Non-infective; Pneumonia;  Not specified |
| Probable phenotype of AE | Categorical | Infectious; Eosinophilic; Non-infectious; Pneumonia; |
| Education on the proper use of inhalers | Categorical | Yes; No |
| **Recommended medications at discharge** |  |  |
| Recommended medications | Categorical | SABA; SAMA; nebulized SABA/SAMA; LABA; LAMA; LABA/LAMA; ICS/LABA; ICS/LABA/LAMA; ICS, Theophylline; Roflumilast; Azithromycin as an immunomodulator, Not specified |
| Oral corticosteroids | Categorical | Yes; No |
| Antibiotic | Categorical | Yes; No |
| Change in chronic inhalation therapy | Categorical | Yes, escalation; Yes, de-escalation; No; Not specified |
| ICS discontinuation | Categorical | Yes; No |
| Change of inhaler type | Categorical | Yes; No |
| **Recommendations on Discharge Letter** |  |  |
| Pulmonologist control (4 weeks) | Categorical | Yes; Yes, with referral; No |
| Pulmonary rehabilitation | Categorical | Yes; Yes, with referral; No |
| Vaccination | Categorical | Yes, influenza; Yes, pneumococcal; No |
| Smoking cessation procedures | Categorical | Yes; No |
| **Re-examination for AE in ER** | Categorical | Yes, in 30 days; Yes, in 90 days; No |
| **Re-hospitalization for AE** | Categorical | Yes, in 30 days; Yes, in 90 days; No |
| **Cost of current hospitalization (Kn)** | Numerical |  |

**Supplementary Table 2**

**PATIENT WITH COPD EXAMINED IN ER AND RELEASED FOR OUTPATIENT TREATMENT**

**(ERDL)**

| **Variable** | **Type** | **Responses** |
| --- | --- | --- |
|  |  |  |
| **Identifiers** | Numerical |  |
| **Patient Demographics** |  |  |
| Sex | Categorical | Female; Male |
| Age (Years) | Numerical |  |
| **ED admission** |  |  |
| Referral pathway | Categorical | GP referral; Ambulance service; On own initiative; Not specified |
| Initial examination in ER | Categorical | Pulmonologist; Specialist of other specialties; Resident |
| Referral diagnosis | Categorical | Acute exacerbation of COPD; Pneumonia; Cardiac decompensation; Asthma; Respiratory failure; Dyspnea; else; Not specified |
| **Smoking** |  |  |
| Smoking status | Categorical | Current smoker; Ex-smoker; Never smoked; Not specified |
| Years of smoking | Numerical |  |
| Daily smoked cigarettes | Numerical |  |
| **COPD severity** |  |  |
| Earlier COPD treatment (years) | Numerical |  |
| Stage of COPD (GOLD I-IV) | Categorical | GOLD I; GOLD II; GOLD III; GOLD IV; Not specified |
| Stage of COPD (GOLD A-D) | Categorical | GOLD A; GOLD B; GOLD C; GOLD D; Not specified |
| **Comorbidities** |  |  |
| Comorbidities | Categorical | Cardiovascular diseases; Arterial hypertension; Diabetes; Obesity; Cachexia; Osteoporosis; Else; Not specified |
| **Previous treatment of COPD** |  |  |
| Previous medication | Categorical | SABA; SAMA; nebulized SABA/SAMA; LABA; LAMA; LABA/LAMA; ICS/LABA; ICS/LABA/LAMA; ICS, Theophylline; Roflumilast; Azithromycin as an immunomodulator; Not specified |
| Inhaler use | Categorical | Yes; No, Not specified |
| Inhaler type | Categorical | pMDI; DPI; Soft mist inhaler; pMDI with spacer |
| COPD therapy adherence | Categorical | Yes; No; Not specified |
| Long term oxygen therapy | Categorical | Yes; No; Not specified |
| **Spirometry** |  |  |
| Earlier spirometry | Categorical | Yes; No; Not specified |
| FEV1 % | Categorical | >=80%; 50-79%; 30-49%; <30% |
| **Previous exacerbations** |  |  |
| AE COPD in previous 12 months | Categorical | Yes; No, Not specified |
| Previous hospitalization for AE COPD | Categorical | Yes, Department; Yes , ICU; No; Not specified |
| Frequent exacerbator | Categorical | Yes; No; Not specified |
| **Current exacerbation** |  |  |
| Symptoms | Categorical | Dyspnea; fever; cough; increased expectoration; purulent cough, Not specified |
| Investigations | Categorical | Complete blood count; Basic biochemistry; troponin; D-dimers; NT pro-BNP; ECG; Chest X-ray; Chest HRCT; MSCT lung angiography; Oxygen hemoglobin saturation; Arterial blood gas analysis; Not specified |
| Blood eosinophil count specified | Categorical | Yes; No |
| Blood eosinophil count (%) | Numerical |  |
| Blood eosinophil count (Eos/mm3) | Numerical |  |
| Therapy of AE in ER | Categorical | Oxygen; SABA; SAMA; Systemic corticosteroid; Aminophylline; Antibiotic; Diuretic, Not specified |
| **Recommended medications on discharge** |  |  |
| Recommended medications | Categorical | SABA; SAMA; nebulized SABA/SAMA; LABA; LAMA; LABA/LAMA; ICS/LABA; ICS/LABA/LAMA; ICS, Theophylline; Roflumilast; Azithromycin as an immunomodulator, Not specified |
| Oral corticosteroids | Categorical | Yes; No |
| Antibiotic | Categorical | Yes; No |
| Change in chronic inhalation therapy | Categorical | Yes, escalation; Yes, de-escalation; No; Not specified |
| ICS discontinuation | Categorical | Yes; No |
| Change of inhaler type | Categorical | Yes; No |
| **Data from ER report** |  |  |
| Stage of COPD estimation | Categorical | Yes; No |
| AE severity estimation | Categorical | Yes; No |
| Blood eosinophil count finding analysis | Categorical | Yes; No |
| AE etiology (phenotype) | Categorical | Infective; Eosinophilic; Non-infective; Pneumonia;  Not specified |
| Probable phenotype of AE | Categorical | Infectious; Eosinophilic; Non-infectious; Pneumonia; |
| Education on the proper use of inhalers | Categorical | Yes; No |
| **Recommendations on the ER report** |  |  |
| Pulmonologist control (2 weeks) | Categorical | Yes; Yes, with referral; No |
| Pulmonary rehabilitation | Categorical | Yes; Yes, with referral; No |
| Vaccination | Categorical | Yes, influenza; Yes, pneumococcal; No |
| Smoking cessation procedures | Categorical | Yes; No |
| **Re-examination for AE in ER** | Categorical | Yes, in 30 days; Yes, in 90 days; No |
| **Re-hospitalization for AE** | Categorical | Yes, in 30 days; Yes, in 90 days; No |
| **Cost of current hospitalization (Kn)** | Numerical |  |
